# Supplementary material for: Impact of Mining Tailings on Soil Decomposition and Carbon Stabilisation in a Riparian Atlantic Forest
Source: Research Square preprint supplement (doi:10.21203/rs.3.rs-4960476/v1), 2025-02-20
Supplement: Supplementary file 1 [file 915f3c1ccbd4ec0b3ba2e5a0.docx]

**Impact of Mining Tailings on Soil Decomposition and Carbon Stabilisation in a Riparian Atlantic Forest**

Milton Barbosa1*, João Carlos Gomes Figueiredo1, Daniel Negreiros1,2, Renata Maia1, Yumi Oki1, Lucas Rodrigues de Souza3, Marcos Paulo dos Santos1, Rebeca Ferreira Reis1, Quezia Emanuelle Ferreira Rocha1, ​​Yule Roberta Ferreira Nunes3, Maria das Dores Magalhães Veloso3, Geraldo Wilson Fernandes1,2,*

1Department of Genetics, Ecology and Evolution, Federal University of Minas Gerais, 31270-901, Belo Horizonte, Brazil.

2Knowledge Center for Biodiversity, 31270-901, Belo Horizonte, Brazil.

3Department of General Biology, Montes Claros State University, 39401-089, Montes Claros, Minas Gerais, Brazil.

* Corresponding authors: [miltonbsjunior@gmail.com](mailto:miltonbsjunior@gmail.com); [gw.fernandes@gmail.com](mailto:gw.fernandes@gmail.com)


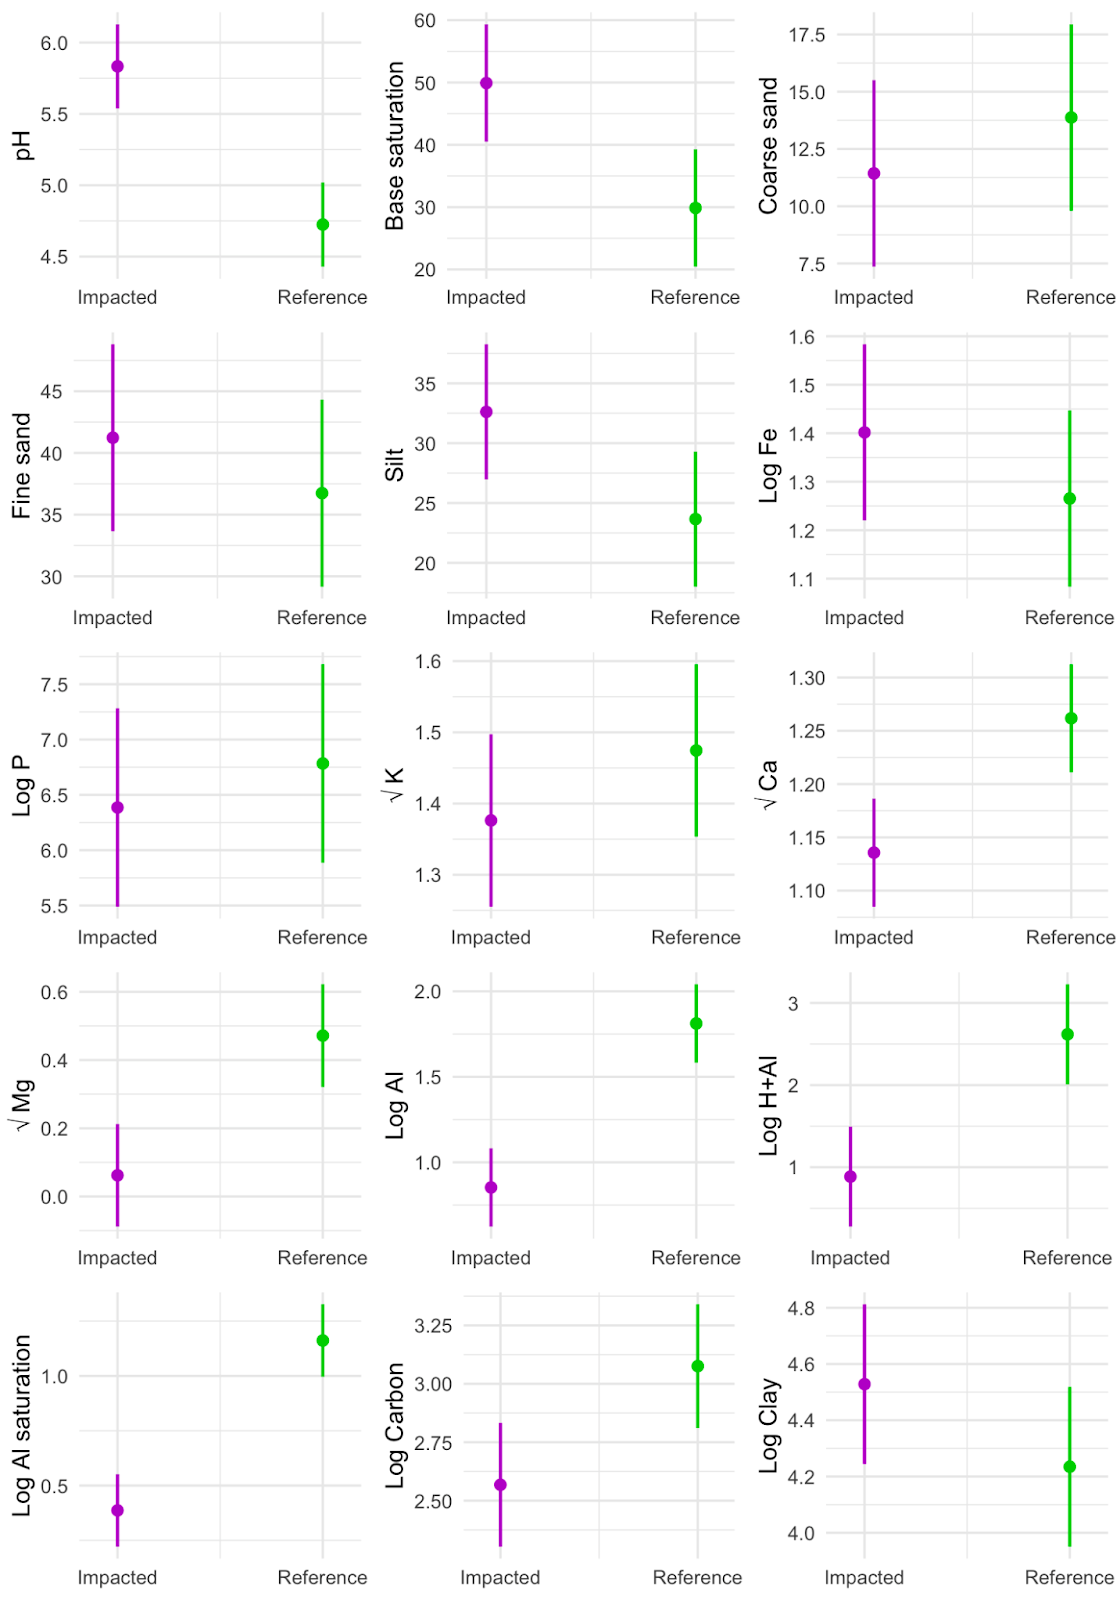
**Fig. S1** Variation in soil physical and chemical parameters between reference soil and soil impacted by mining tailing from the Samarco’s dam breach in Mariana, MG, Brazil

a)

**
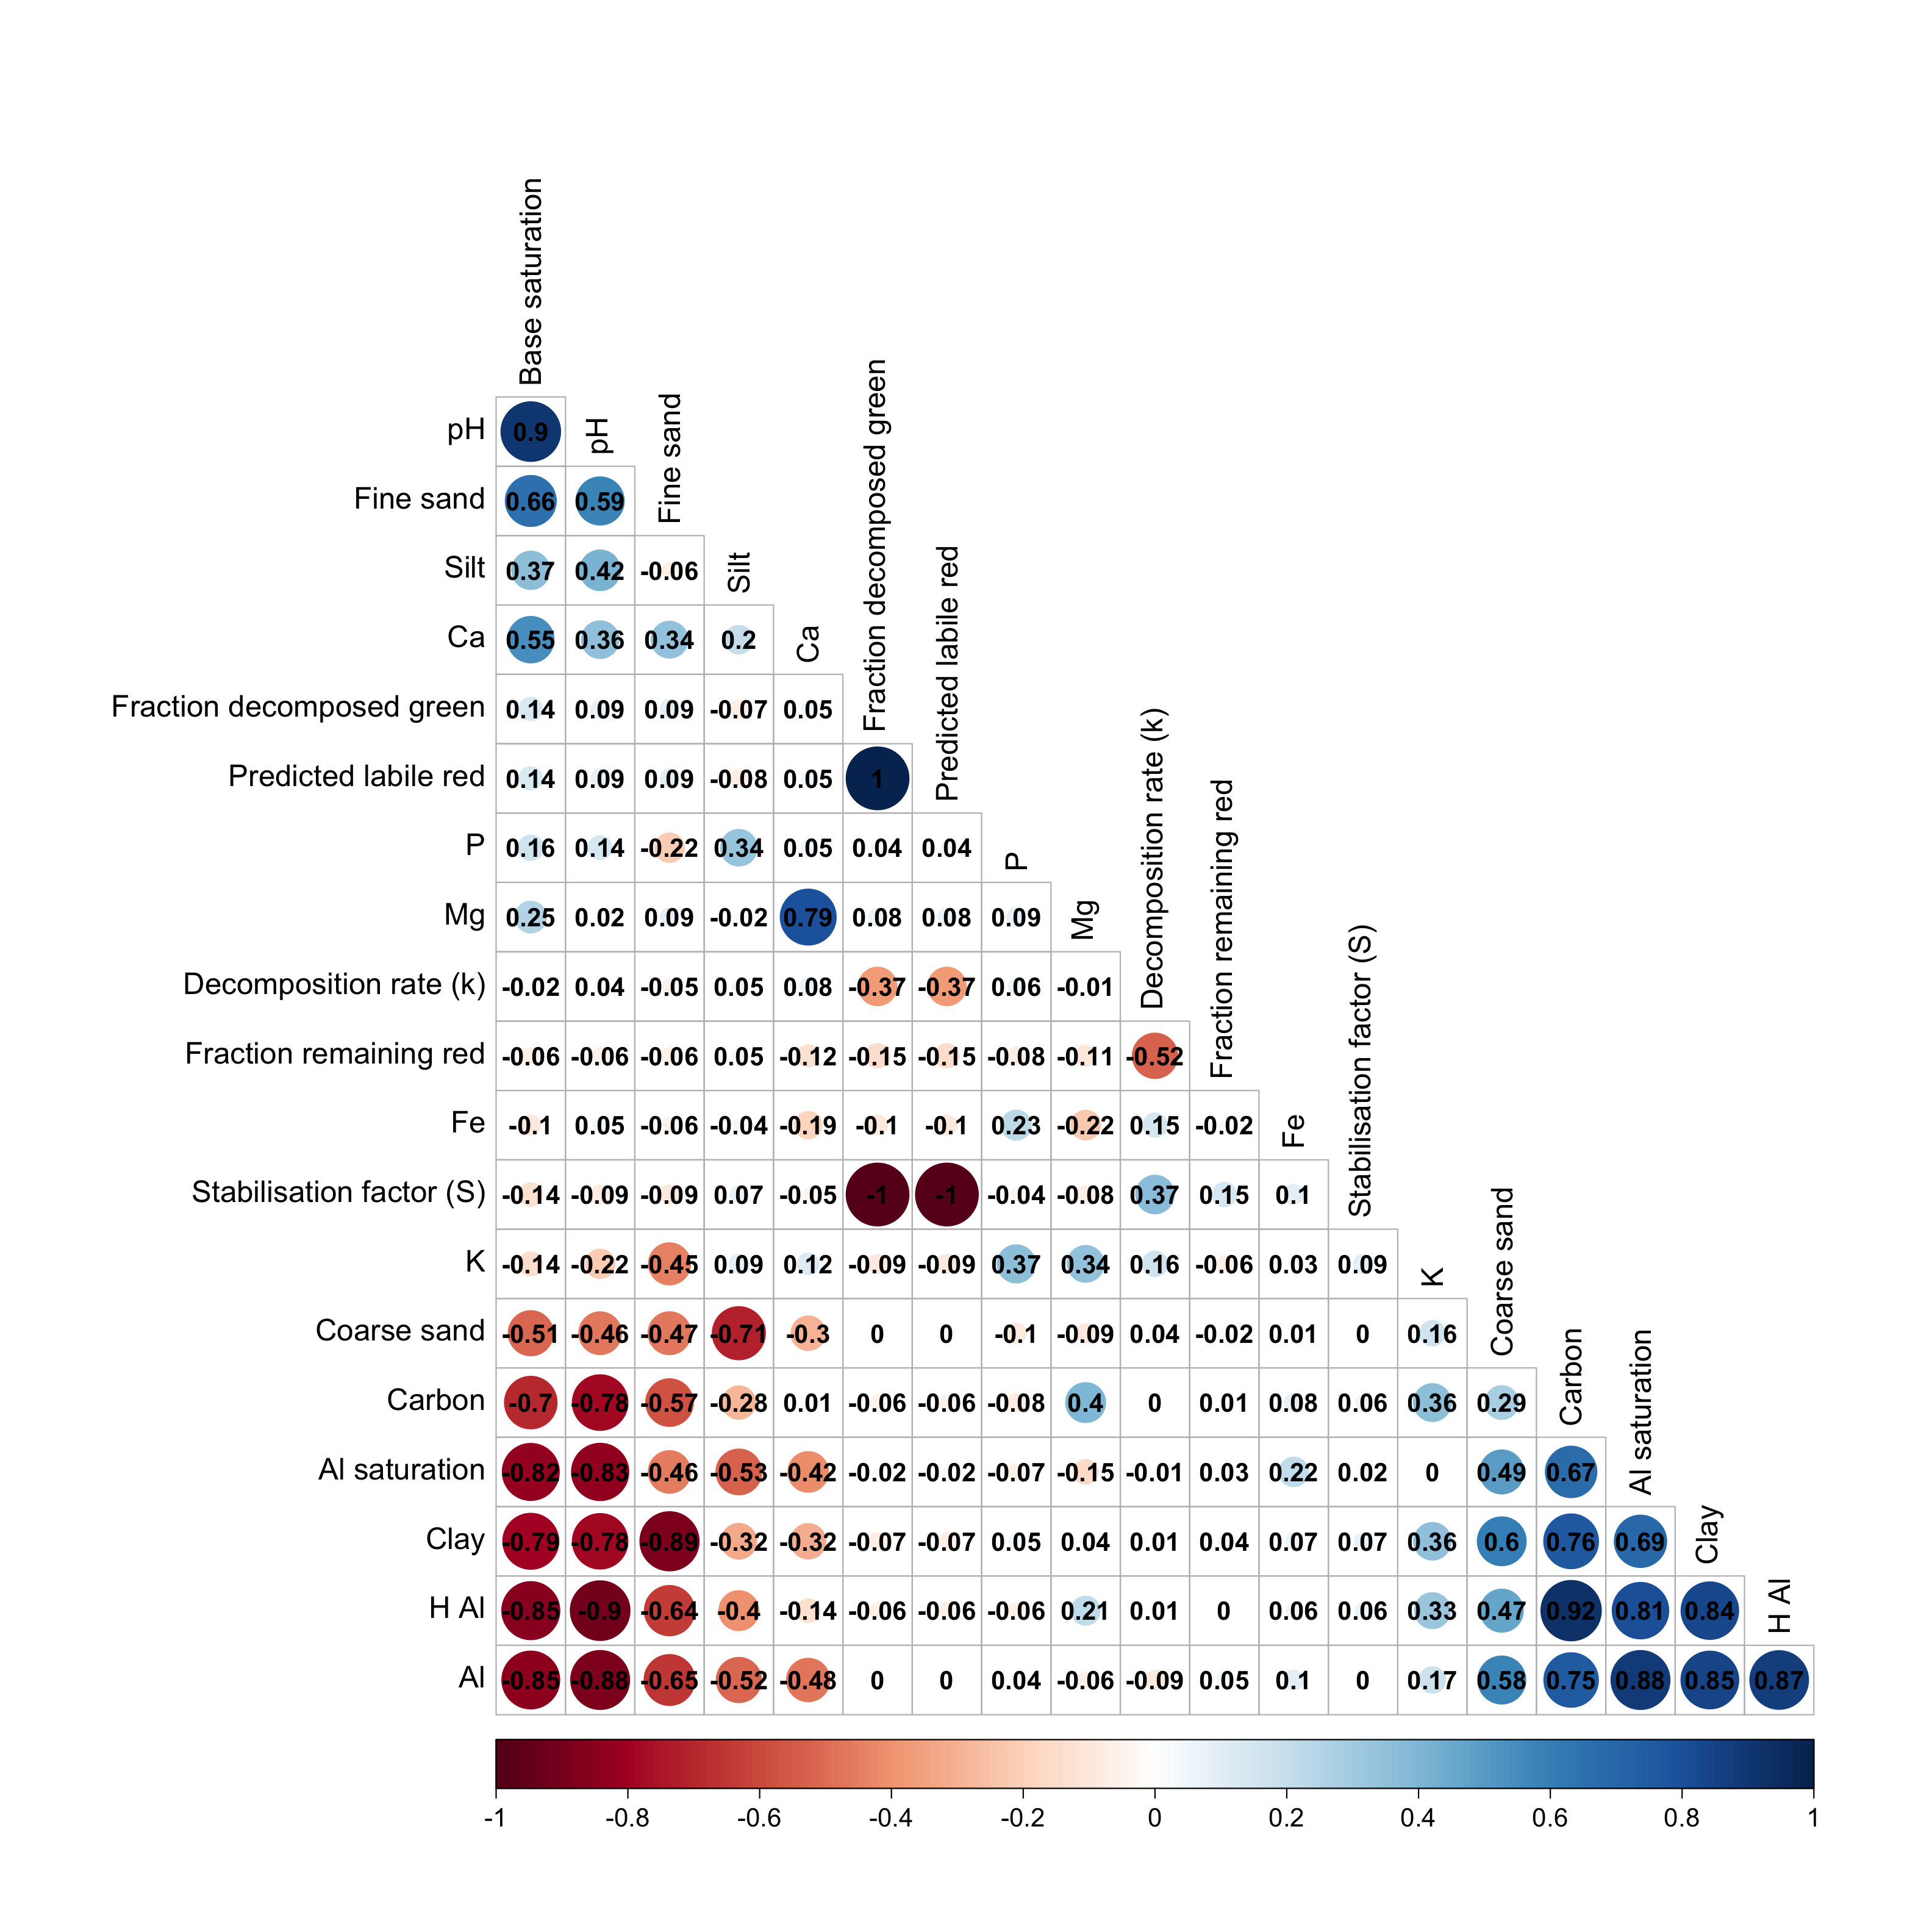
**

b)

**
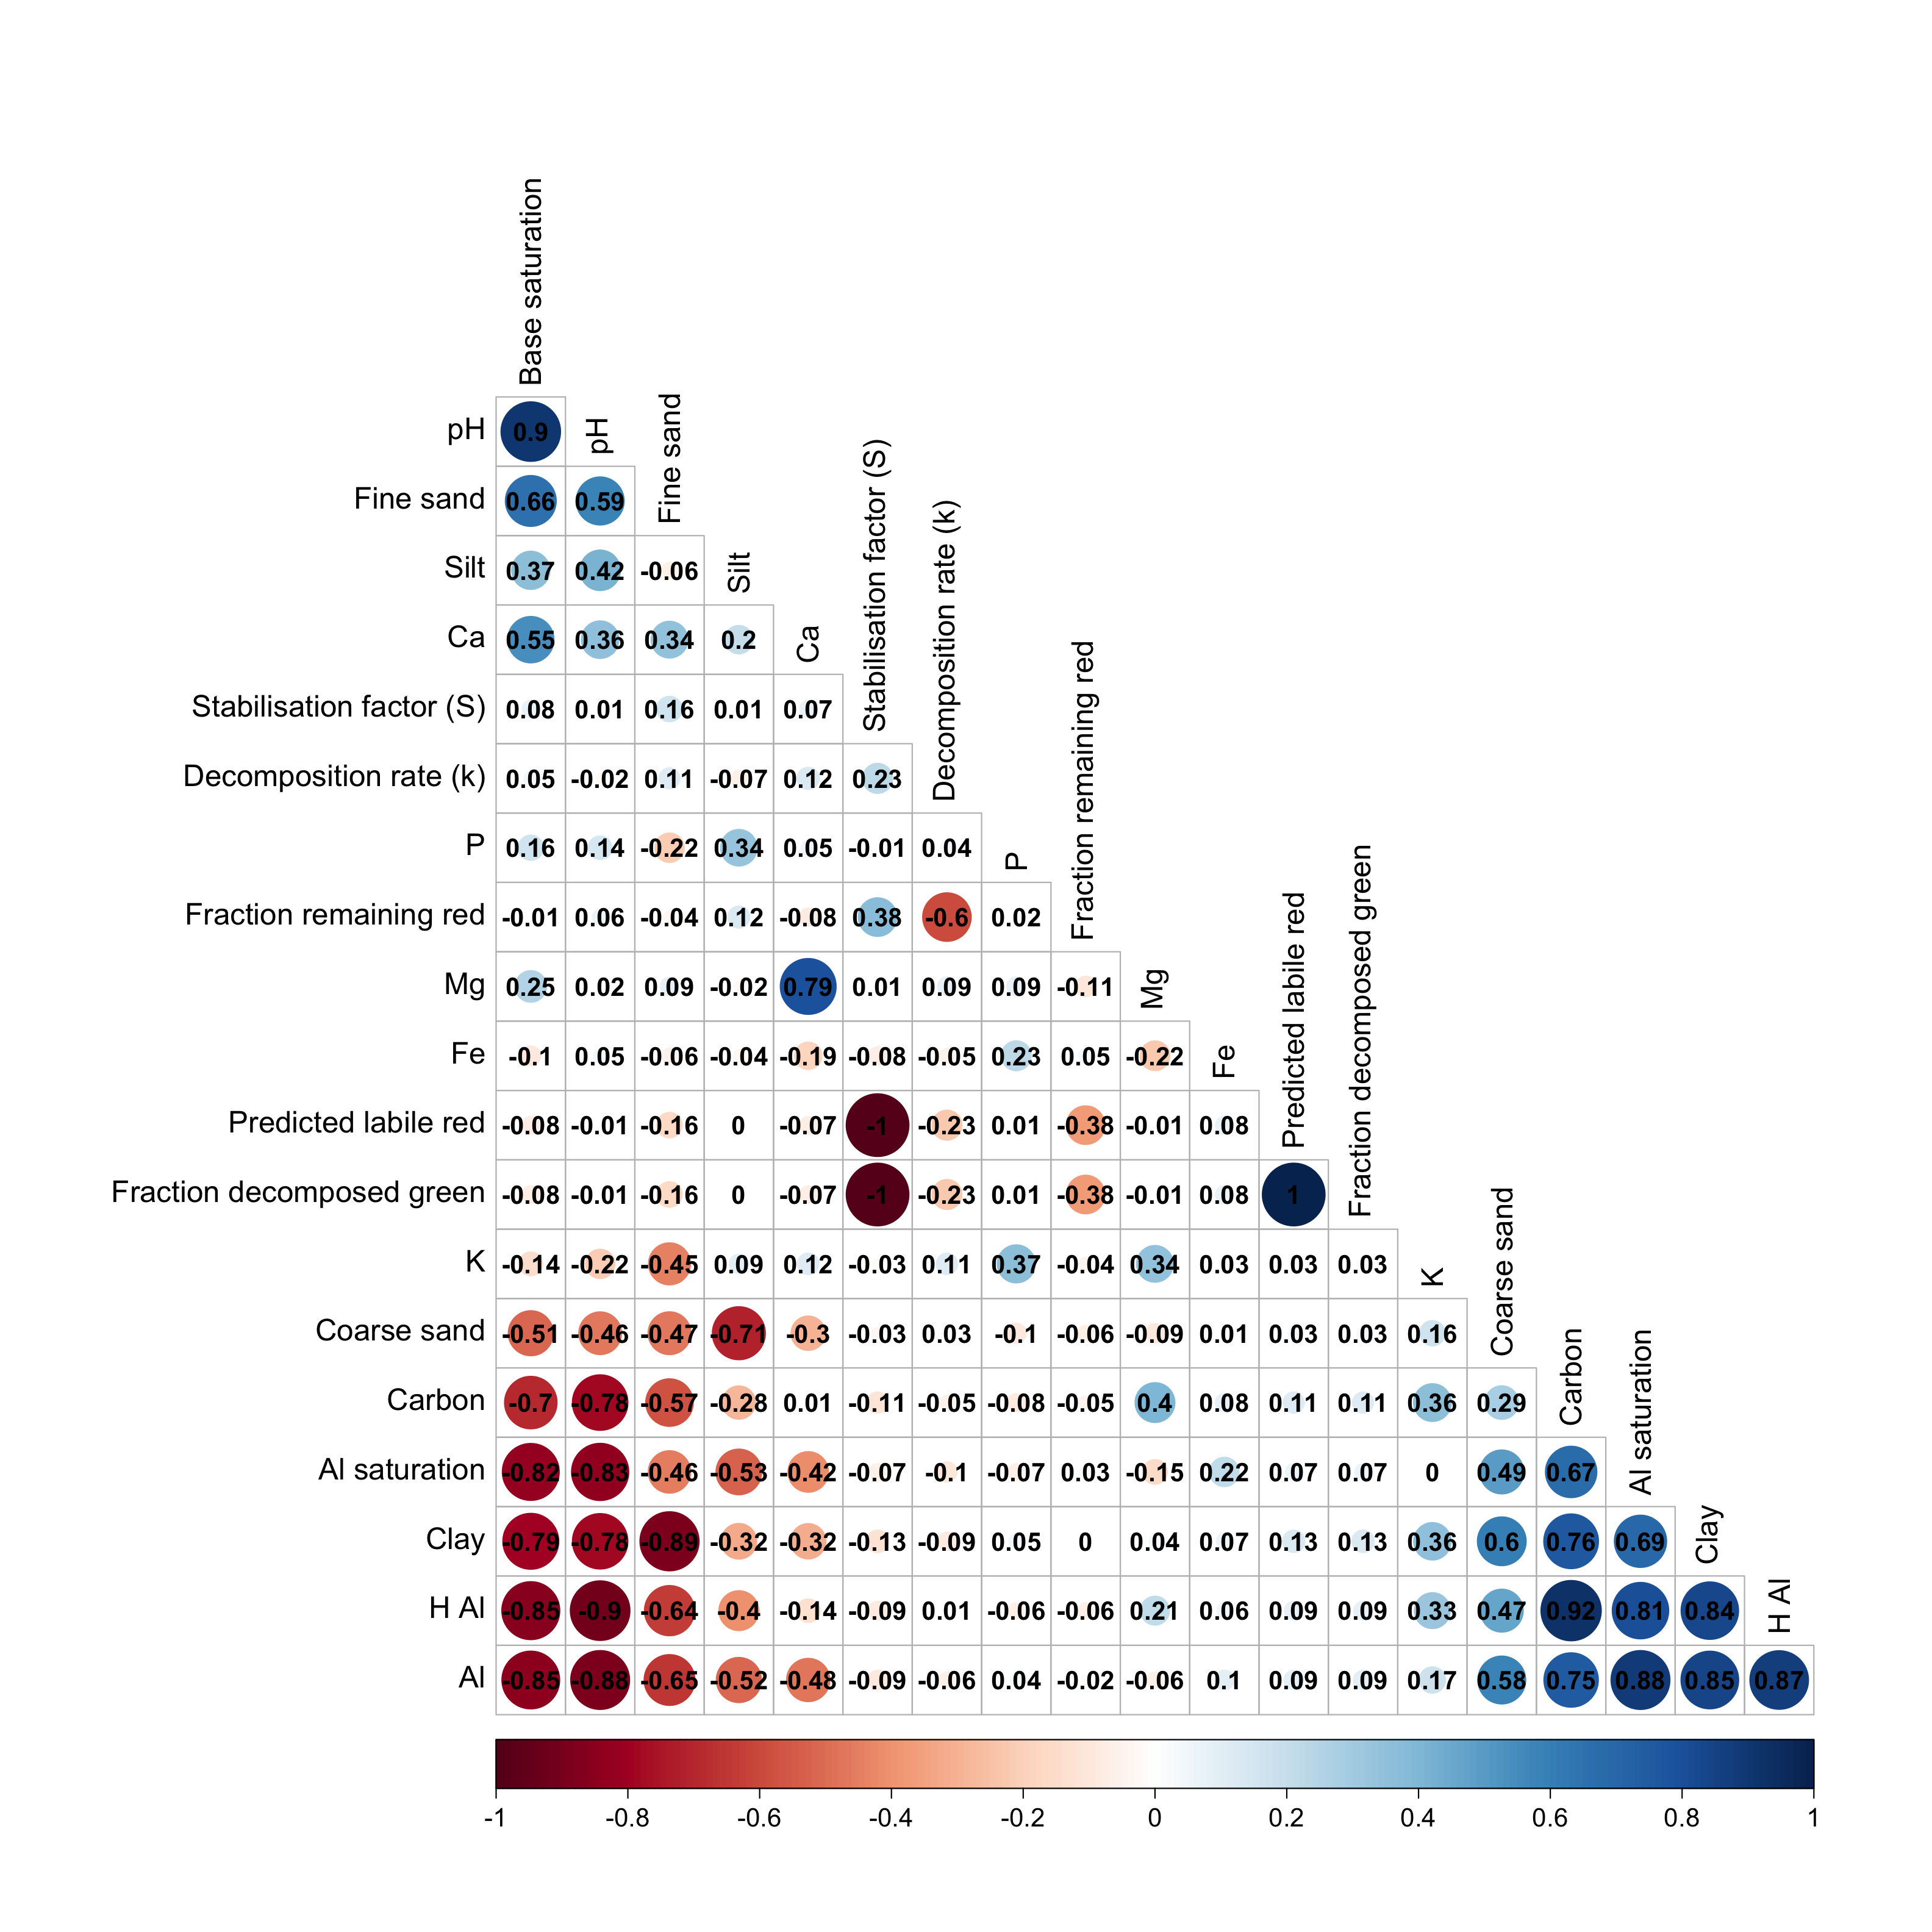
**

**Fig. S2** Pearson Correlation coefficients among the soil physical and chemical variables and decomposition variables from reference soil and soil impacted by mining tailings from the Samarco’s dam breach in Mariana, MG, Brazil in the (a) dry and (b) wet season. The size of each circle indicates the magnitude of the correlation, with larger circles representing stronger correlations. The colour gradient extends from deep blue (strong positive correlation) to deep red (strong negative correlation), illustrating the degree of linear association between pairs of variables. Only the lower triangle of the matrix is shown, organised according to the first principal component to highlight potential clustering patterns among the variables. *k =* decomposition rate; *S* = stabilisation factor

**Table S1** Stepwise model selection results. The first four best-fitting model candidates are ranked based on their optimal balance between explanatory power and complexity (lower AIC). The global models are the full models subjected to stepwise selection. The positive sign (+) indicates the covariates included in the respective model. Only terms that appear in at least one of the top four models are displayed. Delta is the AIC difference between models

| GLOBAL MODEL: Decomposition Rate (*k*): *k* ~ treatment : time : season + PC1 : time : season + PC2 : time : season + *S* : time : season + (1 | sample ID) | | | | | | | | | | | | | | | |
| --- | --- | --- | --- | --- | --- | --- | --- | --- | --- | --- | --- | --- | --- | --- | --- |
| **Model** | **Intercept** | **PC2** | ***S*** | **season** | **time** | **treatment** | **season : time** | **season : treatment** | **time : treatment** | **season : time : treatment** | **df** | **logLik** | **AIC** | **delta** | **weight** |
| 290877 | -6.09E-05 |  | 0.1038 | + | + | + | + | + | + | + | 15 | 544.184 | -1058.4 | 0 | 0.077 |
| 20541 | 1.30E-03 |  | 0.1026 | + | + | + | + |  | + |  | 12 | 540.943 | -1057.9 | 0.48 | 0.06 |
| 290879 | 6.58E-04 | 0.001521 | 0.1042 | + | + | + | + | + | + | + | 16 | 544.914 | -1057.8 | 0.54 | 0.059 |
| 20543 | 2.03E-03 | 0.001517 | 0.103 | + | + | + | + |  | + |  | 13 | 541.669 | -1057.3 | 1.03 | 0.046 |
|  |  |  |  |  |  |  |  |  |  |  |  |  |  |  |  |
| GLOBAL MODEL: Stabilisation Factor (S): S ~ treatment : time : season + PC1 : time : season + PC2 : time : season + (1 | sample ID) | | | | | | | | | | | | | | |  |
| **Model** | **Intercept** | **PC1** | **PC2** | **season** | **time** | **treatment** | **PC1 : season** | **season : treatment** | **time : treatment** | **df** | **logLik** | **AIC** | **delta** | **weight** |  |
| 2110 | -0.9682 | -0.02028 |  | + | + | + | + |  | + | 11 | 227.563 | -433.1 | 0 | 0.206 |  |
| 2112 | -0.9892 | -0.016 | -0.02352 | + | + | + | + |  | + | 12 | 227.848 | -431.7 | 1.43 | 0.101 |  |
| 3134 | -0.937 | -0.02709 |  | + | + | + | + | + | + | 12 | 227.798 | -431.6 | 1.53 | 0.096 |  |
| 46 | -0.96 | -0.02784 |  | + | + |  | + |  |  | 8 | 223.547 | -431.1 | 2.03 | 0.075 |  |
